# Supplementary material
Source: publisher figshare collection journal article supplement (https://acs.figshare.com/ndownloader/files/5699676)
Supplement: Supplementary file 1 [file 5699676]

## Experimental Details

Zheng He, Cheng He, En-Qing Gao, Zhe-Ming Wang, Xiao-Fan Yang,  
Chun-Sheng Liao, and Chun-Hua Yan\*

### Synthesis.

**HL.** To a solution of isonicotinic hydrazide N-oxide (1.019 g, 6.49 mmol) in ethanol (30 cm<sup>3</sup>) was added 2-pyridylaldehyde (0.725 g, 6.77 mmol). After addition of a few drops of glacial acetic acid the solution was refluxed for 6 h. The solid was separated and dried to give HL as a light yellow solid. Yield: 1.308 g, 82%.

**Compound 1.** To a solution of HL (0.047 g, 0.175 mmol) in DMF (10 cm<sup>3</sup>) was added Ni(ClO<sub>4</sub>)<sub>2</sub>·6H<sub>2</sub>O (0.046 g, 0.126 mmol). Diffusion of benzene into the resulting brownish red solution over two weeks gave brownish red crystals of **1** in 63% yield.

**Compound 2.** To the brownish red solution of HL (0.0464 g, 0.172 mmol) and Ni(ClO<sub>4</sub>)<sub>2</sub>·6H<sub>2</sub>O (0.0478 g, 0.126 mmol) in DMF (10 cm<sup>3</sup>) was added Gd(ClO<sub>4</sub>)<sub>3</sub>·6H<sub>2</sub>O (0.0796 g, 0.141 mmol). Diffusion of benzene/acetonitrile into the resulting brownish red solution over three weeks gave brownish red crystals of **2** in 50% yield.

**Compound 3.** To the brownish red solution of HL (0.0468 g, 0.174 mmol) and Ni(ClO<sub>4</sub>)<sub>2</sub>·6H<sub>2</sub>O (0.0473 g, 0.129 mmol) in DMF (10 cm<sup>3</sup>) was added Tb(ClO<sub>4</sub>)<sub>3</sub>·6H<sub>2</sub>O (0.0911 g, 0.161 mmol). Diffusion of benzene/acetonitrile into the resulting brownish red solution over two weeks gave brownish red crystals of **3** in 41% yield.

**Compound 4.** To the brownish red solution of HL (0.0473 g, 0.176 mmol) and Ni(ClO<sub>4</sub>)<sub>2</sub>·6H<sub>2</sub>O (0.0480 g, 0.131 mmol) in DMF (10 cm<sup>3</sup>) was added Dy(ClO<sub>4</sub>)<sub>3</sub>·6H<sub>2</sub>O (0.0802 g, 0.141 mmol). Diffusion of benzene/acetonitrile into the resulting brownish red solution over two weeks gave brownish red crystals of **4** in 16% yield.

Anal. Calcd. For C<sub>24</sub>H<sub>26</sub>N<sub>8</sub>O<sub>7</sub> (**HL**): C, 53.53; H, 4.87; N, 20.81. Found: C, 53.78; H, 4.793; N, 20.91%.

Anal. Calcd. For NiC<sub>24</sub>H<sub>23</sub>N<sub>8</sub>O<sub>10</sub>Cl (**1**): C, 42.54; H, 3.42; N, 16.54. Found: C, 42.81; H, 3.72; N, 16.73%.

Anal. Calcd. For GdNi<sub>2</sub>C<sub>60</sub>H<sub>75</sub>N<sub>20</sub>O<sub>33</sub>Cl<sub>4</sub> (**2**): C, 35.66; H, 3.74; N, 13.86. Found: C, 35.69; H, 4.20; N, 13.93%.

Anal. Calcd. For TbNi<sub>2</sub>C<sub>60</sub>H<sub>65</sub>N<sub>20</sub>O<sub>28</sub>Cl<sub>4</sub> (**3**): C, 37.29; H, 3.39; N, 14.50. Found: C, 37.41; H, 3.86; N, 14.42%.

Anal. Calcd. For DyNi<sub>2</sub>C<sub>60</sub>H<sub>70</sub>N<sub>20</sub>O<sub>27</sub>Cl<sub>3</sub> (**4**): C, 38.14; H, 3.73; N, 14.83. Found: C, 38.06; H, 4.13; N, 14.68%.

**Crystallographic Studies.** Diffraction intensity data for single crystals of **1**, **2**, **3** and **4** were collected at 180K on a Nonius Kappa CCD diffractometer equipped with graphite-monochromated Mo K $\alpha$  radiation ( $\lambda$  = 0.71073 Å). Empirical absorption corrections were applied using the Sortav program.<sup>1</sup> The structure was solved by the direct method and refined by the full-matrix least-squares method on  $F^2$  with anisotropic thermal parameters for all non-hydrogen atoms.<sup>2</sup> Hydrogen atoms were located geometrically and refined isotropically. See the CIF file for details.

**Physical measurements.** Elemental analyses (C, H, N) were performed on an Elementar Varia EL analyzer. Variable-

temperature magnetic susceptibilities were measured on a MagLab 2000 magnetometer.

- (1) (a) Blessing, R. H. *Acta Crystallogr.* **1995**, *A51*, 33. (b) Blessing, R. H. *J. Appl. Crystallogr.* **1997**, *30*, 421.  
(2) (a) Sheldrick, G. M. SHELXTL Version 5.1. Bruker Analytical X-ray Instruments Inc., Madison, Wisconsin, USA, **1998**. (b) Sheldrick, G. M. SHELXL-97, PC Version. University of Göttingen, Germany, **1997**.
